# Supplementary material
Source: Frontiers journal article supplement (https://www.frontiersin.org/articles/530451)

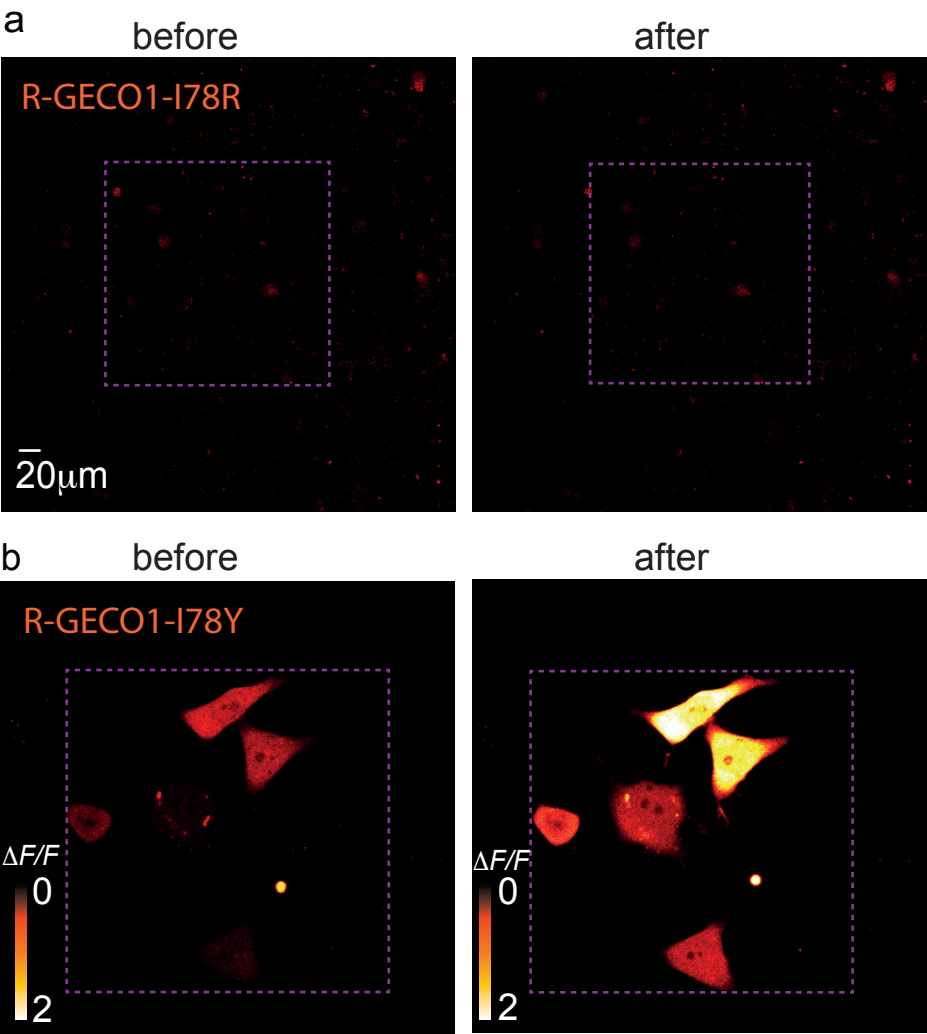

Supplement: Image_2.pdf [file Image_2.pdf]
